# Supplementary material for: Porous carbon derived from metal–organic framework@graphene quantum dots as electrode materials for supercapacitors and lithium-ion batteries
Source: Royal Society of Chemistry journal article supplement (doi:10.1039/c9ra01488h), 2019-01-01
Supplement: c9ra01488h1.pdf [file c9ra01488h1.pdf]

## Supporting information for

### **Porous carbon derived from metal-organic framework@graphene quantum dots as electrode materials for supercapacitors and lithium-ion batteries**

Hui Yu,<sup>a</sup> Wenjian Zhu,<sup>a</sup> Hu Zhou,<sup>b</sup> Jianfeng Liu,<sup>\*,c</sup> Zhen Yang,<sup>c</sup> Xiaocai Hu,<sup>c</sup> Aihua  
Yuan,<sup>\*,a,d</sup>

<sup>a</sup> *School of Environmental and Chemical Engineering, Jiangsu University of Science and Technology, Zhenjiang 212003, China. E-mail: aihua.yuan@just.edu.cn.*

<sup>b</sup> *School of Material Science and Engineering, Jiangsu University of Science and Technology, Zhenjiang 212003, China.*

<sup>c</sup> *Shanghai Waigaoqiao Shipbuilding Co., LTD, Shanghai 200137, China.*

<sup>d</sup> *Marine Equipment and Technology Institute, Jiangsu University of Science and Technology, Zhenjiang 212003, China.*

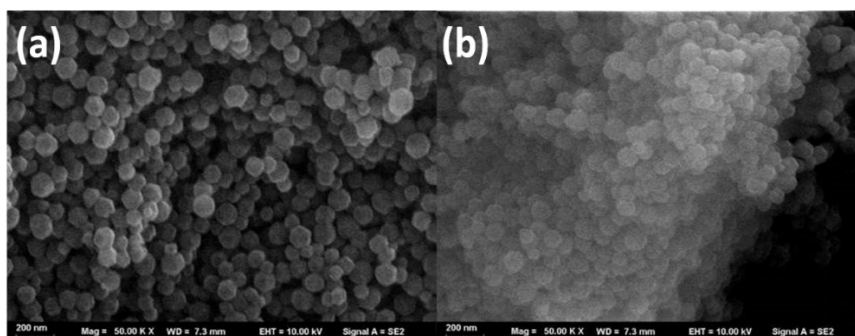

Fig. S1 SEM images of (a) ZIF-8 and (b) ZIF-8@GQDs.

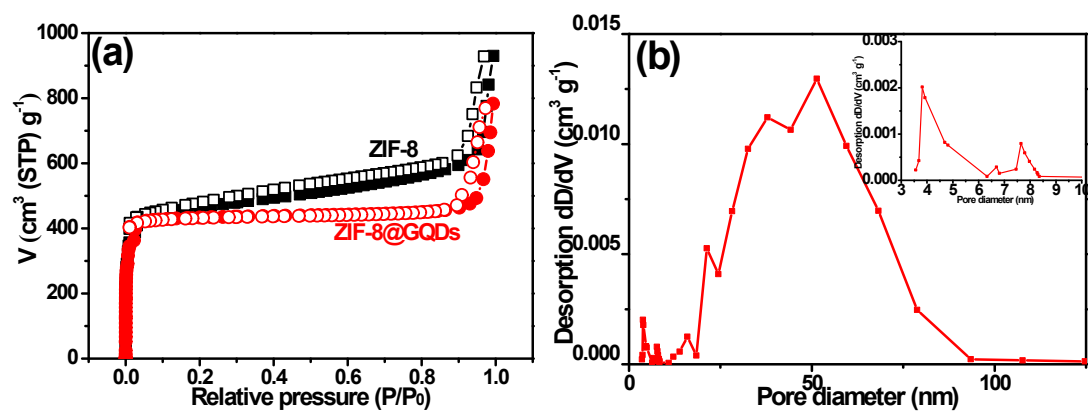

Fig. S2 (a) The  $N_2$  adsorption-desorption isotherm of ZIF-8 and ZIF-8@GQDs; (b) pore size distribution of ZIF-8

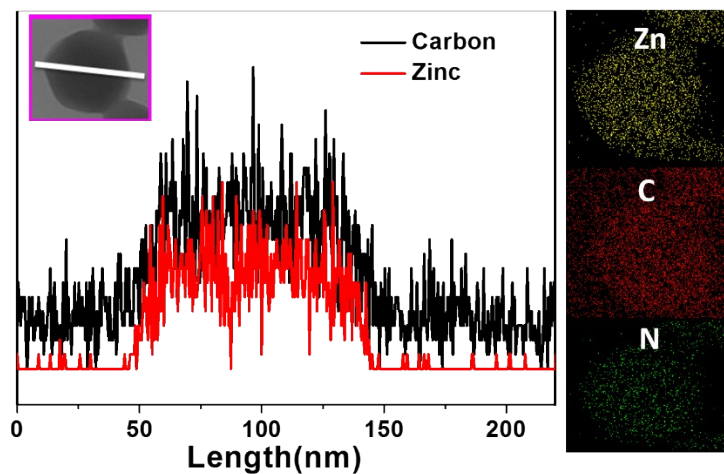

Fig. S3 Elemental line profiles and elemental mapping of ZIF-8@GQDs.

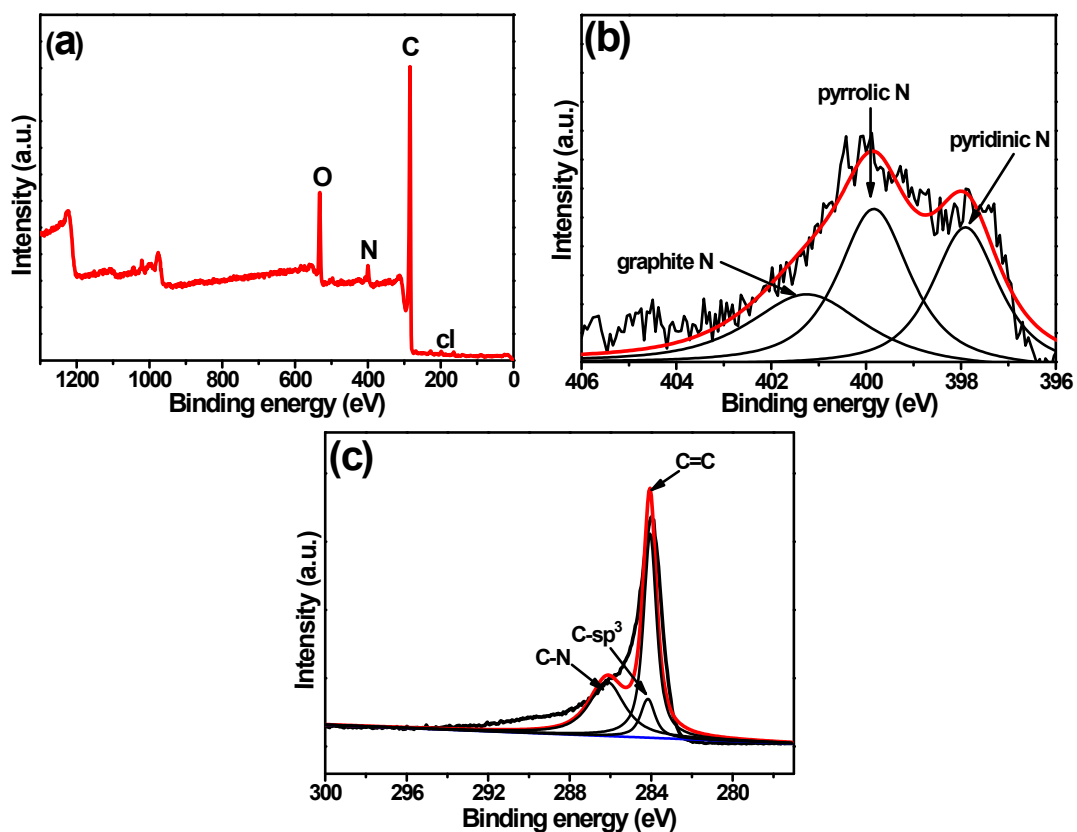

**Fig. S4** XPS spectra of C(ZIF-8);(a)survey; (b) N 1s; (c) C 1s.

Table 1 The composition of the obtained porous carbon samples.

| C(ZIF-8)<br>@GQ<br>Ds | XPS (%) |      |       |      |      | N 1s (%)   |            |             |
|-----------------------|---------|------|-------|------|------|------------|------------|-------------|
|                       | C       | N    | O     | Zn   | Cl   | graphite N | pyrrolic N | pyridinic N |
|                       | 84.58   | 5.67 | 8.37  | 0.53 | 0.85 | 49.33      | 23.64      | 27.03       |
| C(ZIF-8)              | 82.31   | 5.39 | 11.78 | 0    | 0.53 | 28.83      | 38.83      | 32.33       |

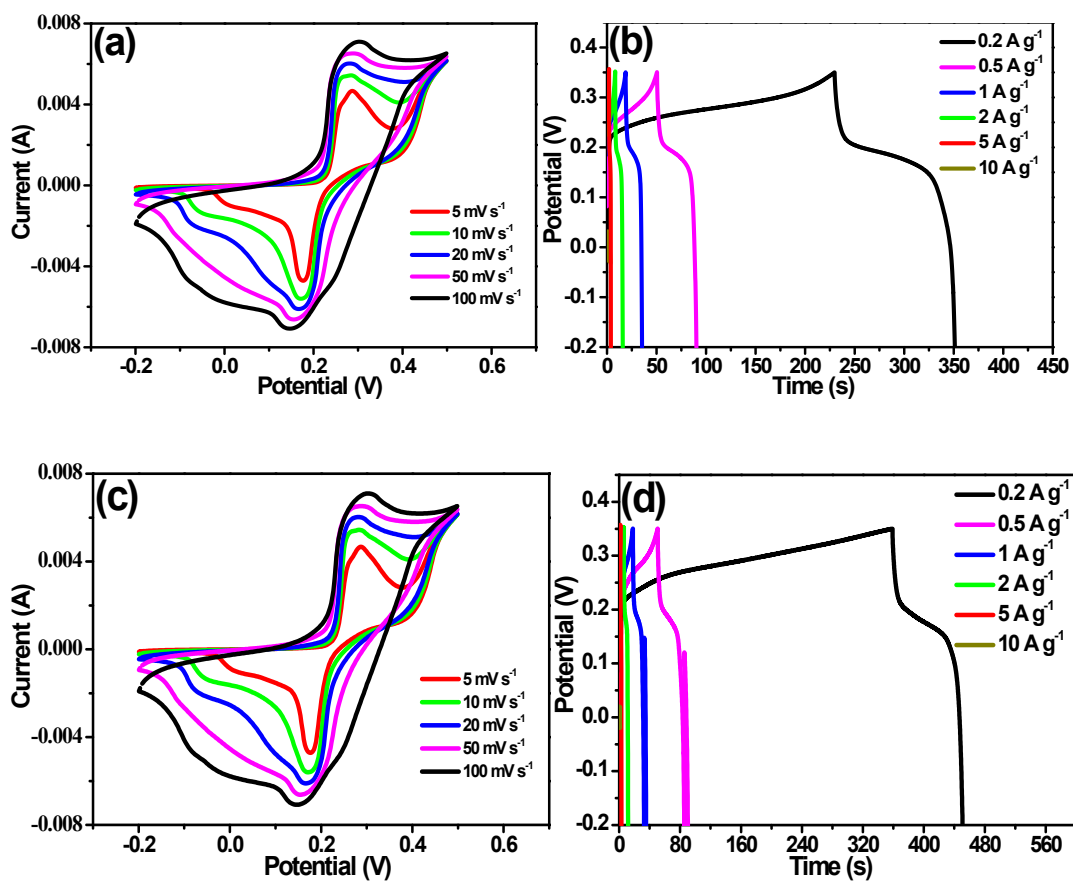

**Fig. S5** (a) CV curves of ZIF-8 at different scan rates; (b) GCD curves of ZIF-8 at different current (c) CV curves of ZIF-8@GQDs at different scan rates; (d) GCD curves of ZIF-8@GQDs at different current densities.

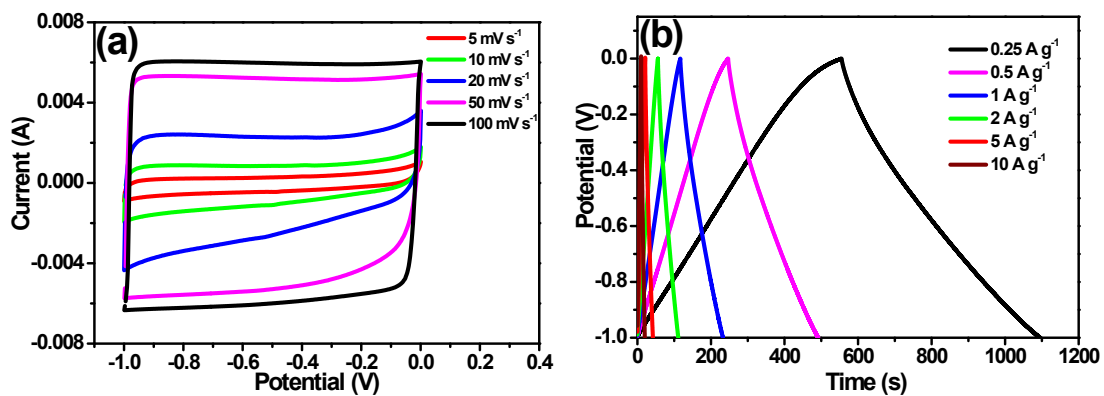

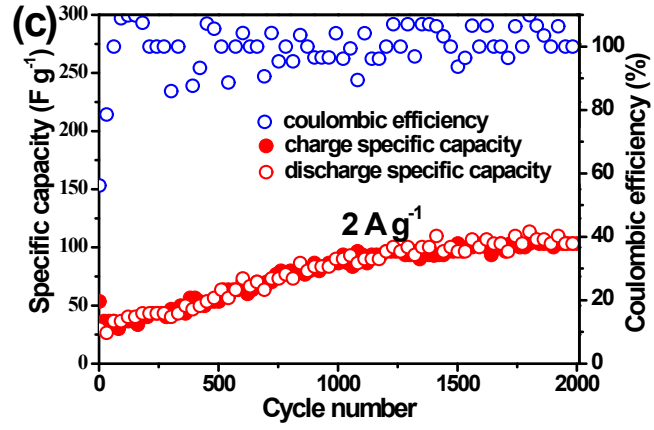

**Fig. S6** (a) CV curves of C(ZIF-8) at different scan rates; (b) GCD curves of C(ZIF-8) at different current densities; (c) cycling performance of C(ZIF-8) at  $2 \text{ A g}^{-1}$ .
